# Supplementary material
Source: PubMed Central journal article supplement (PMC9523973)
Supplement: NIHMS1837894-supplement-1.pdf [file NIHMS1837894-supplement-1.pdf]

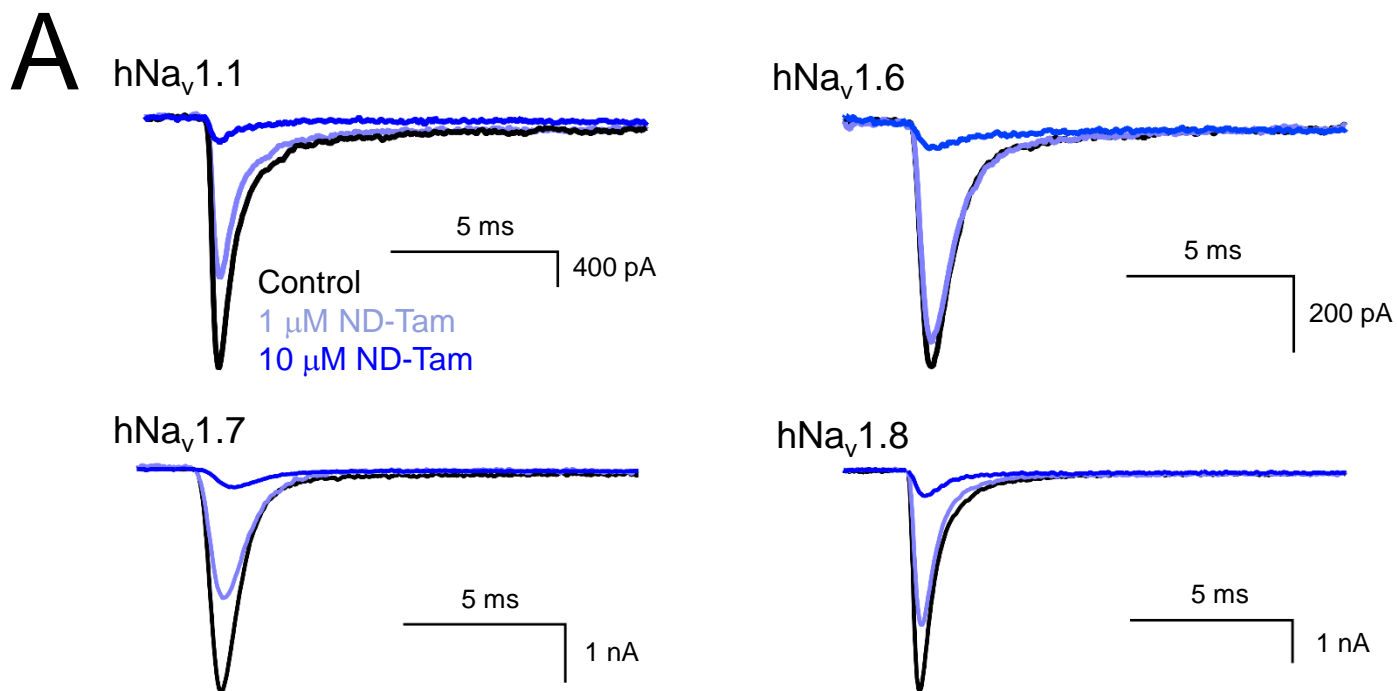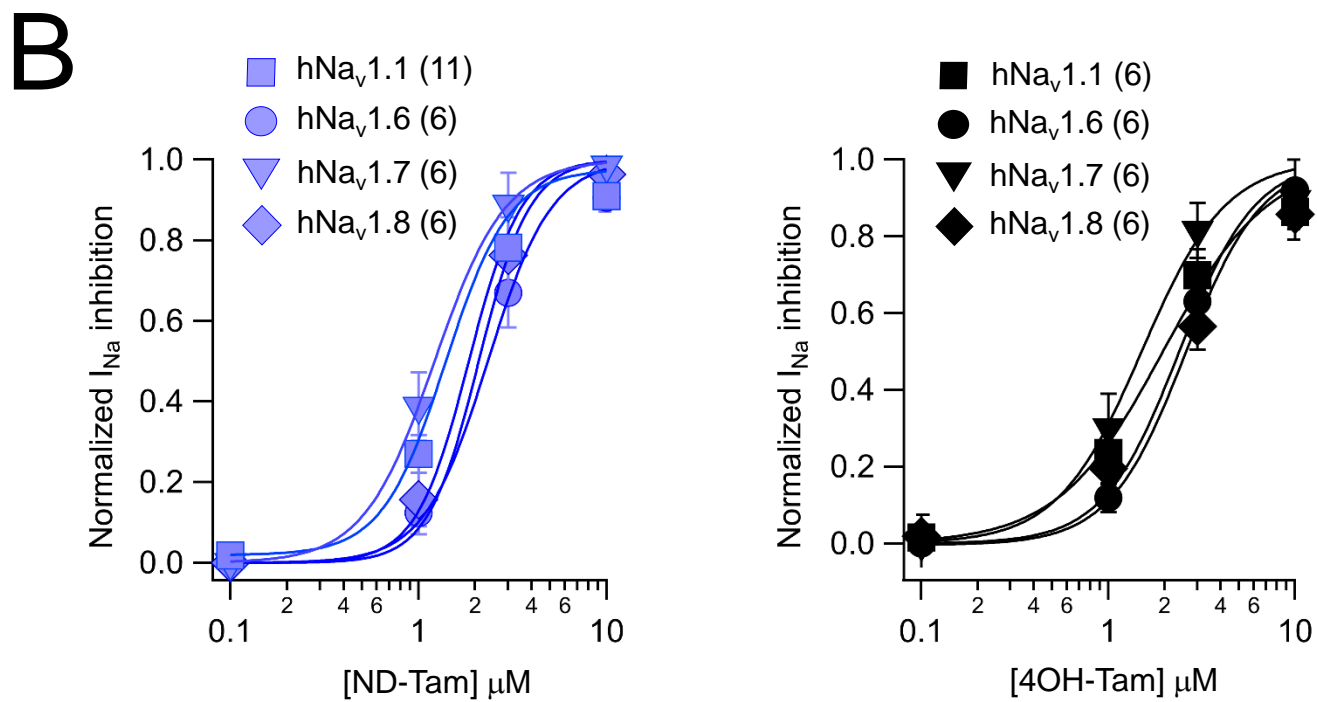

Supplemental Figure 1

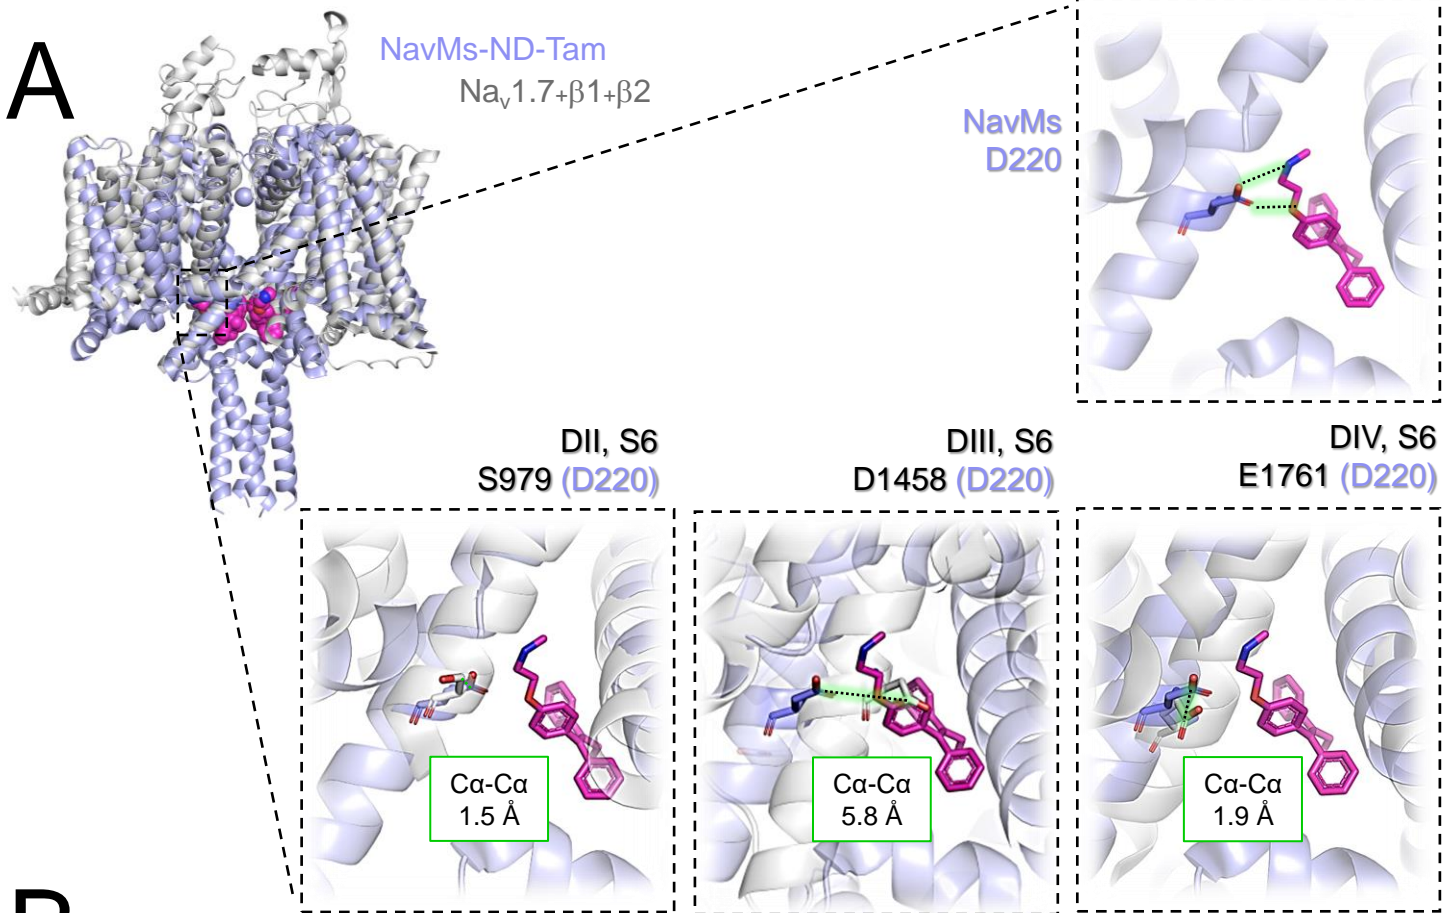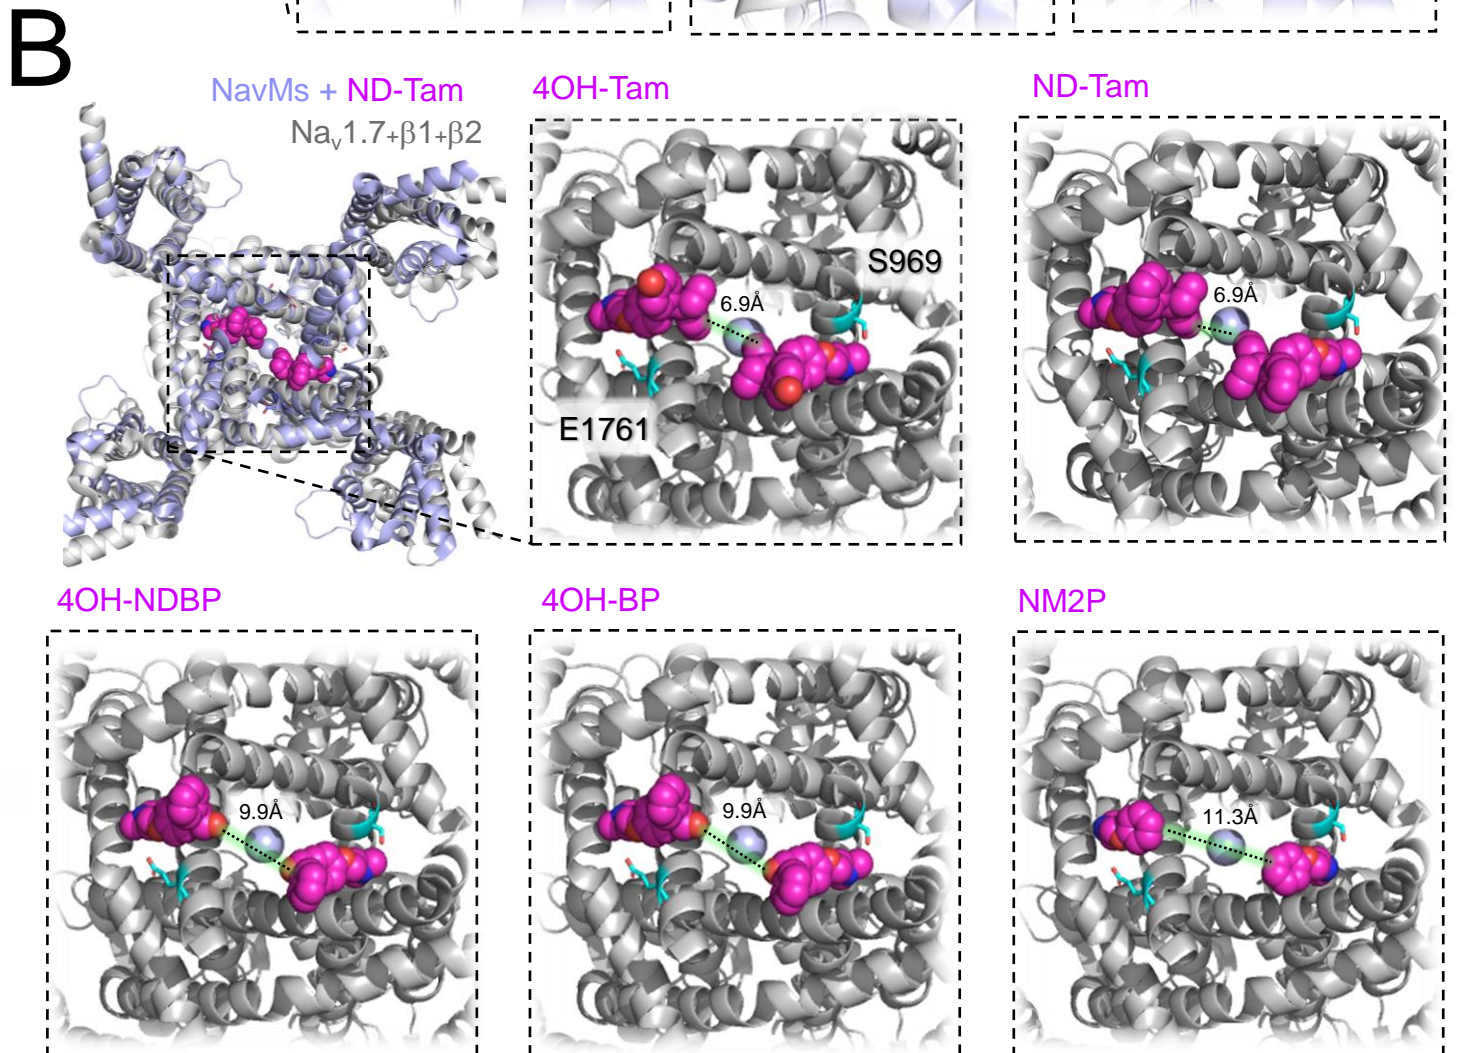

Supplemental Figure 2

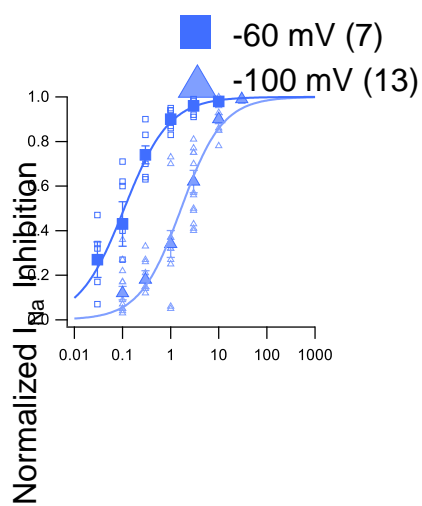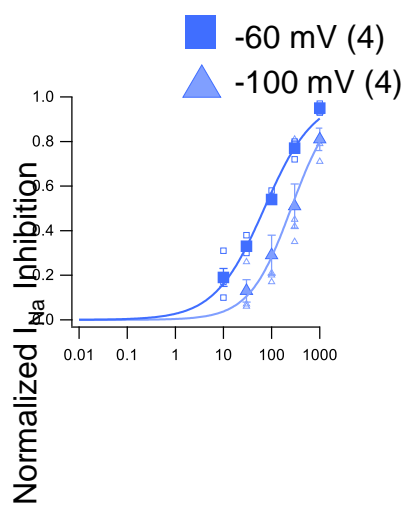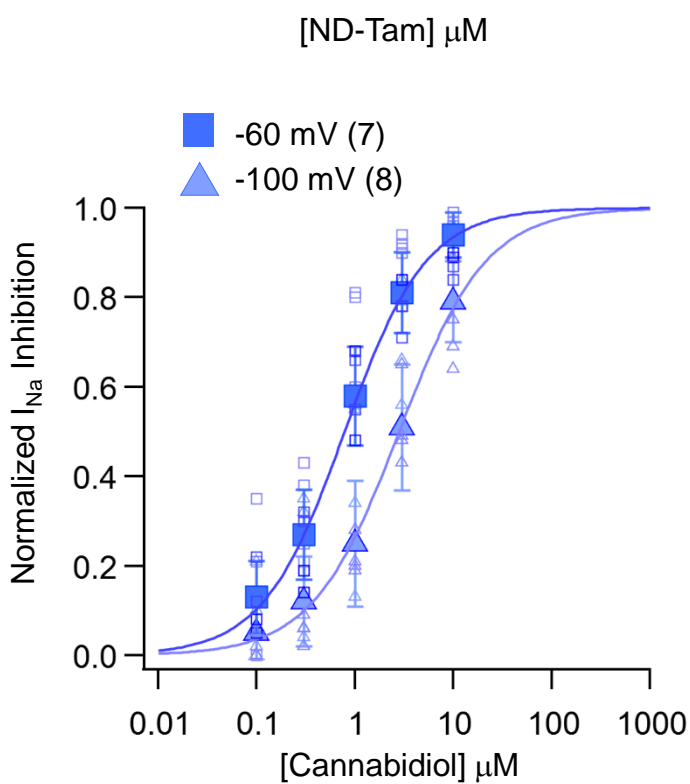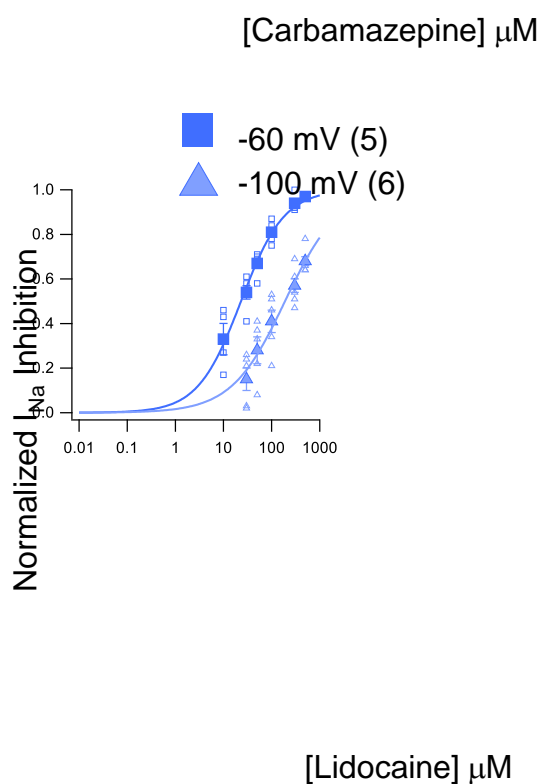

Supplemental Figure 3

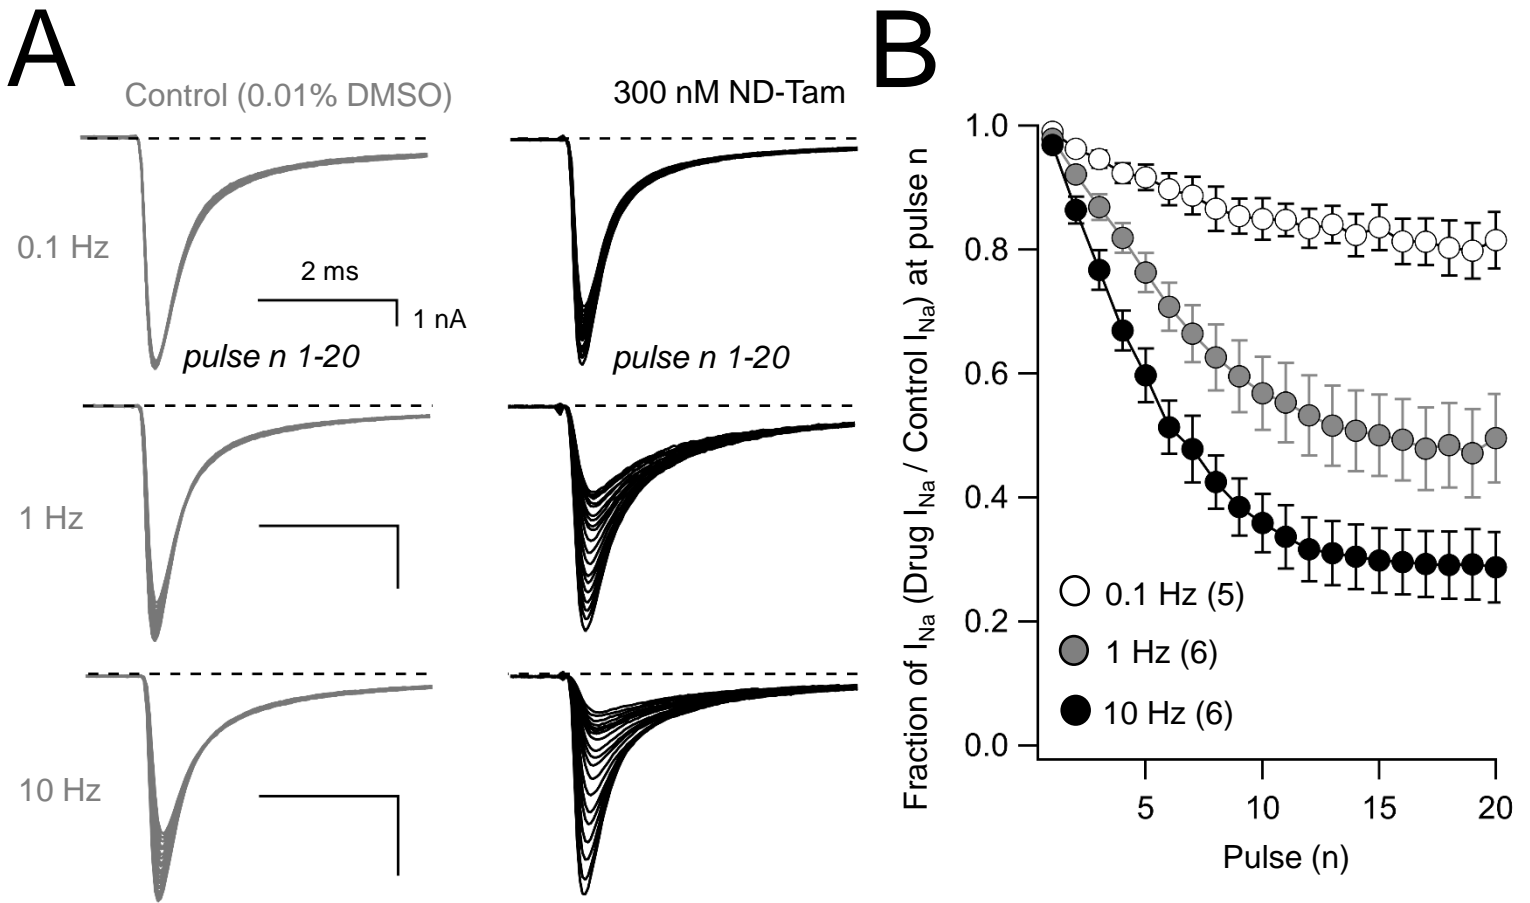

Supplemental Figure 4

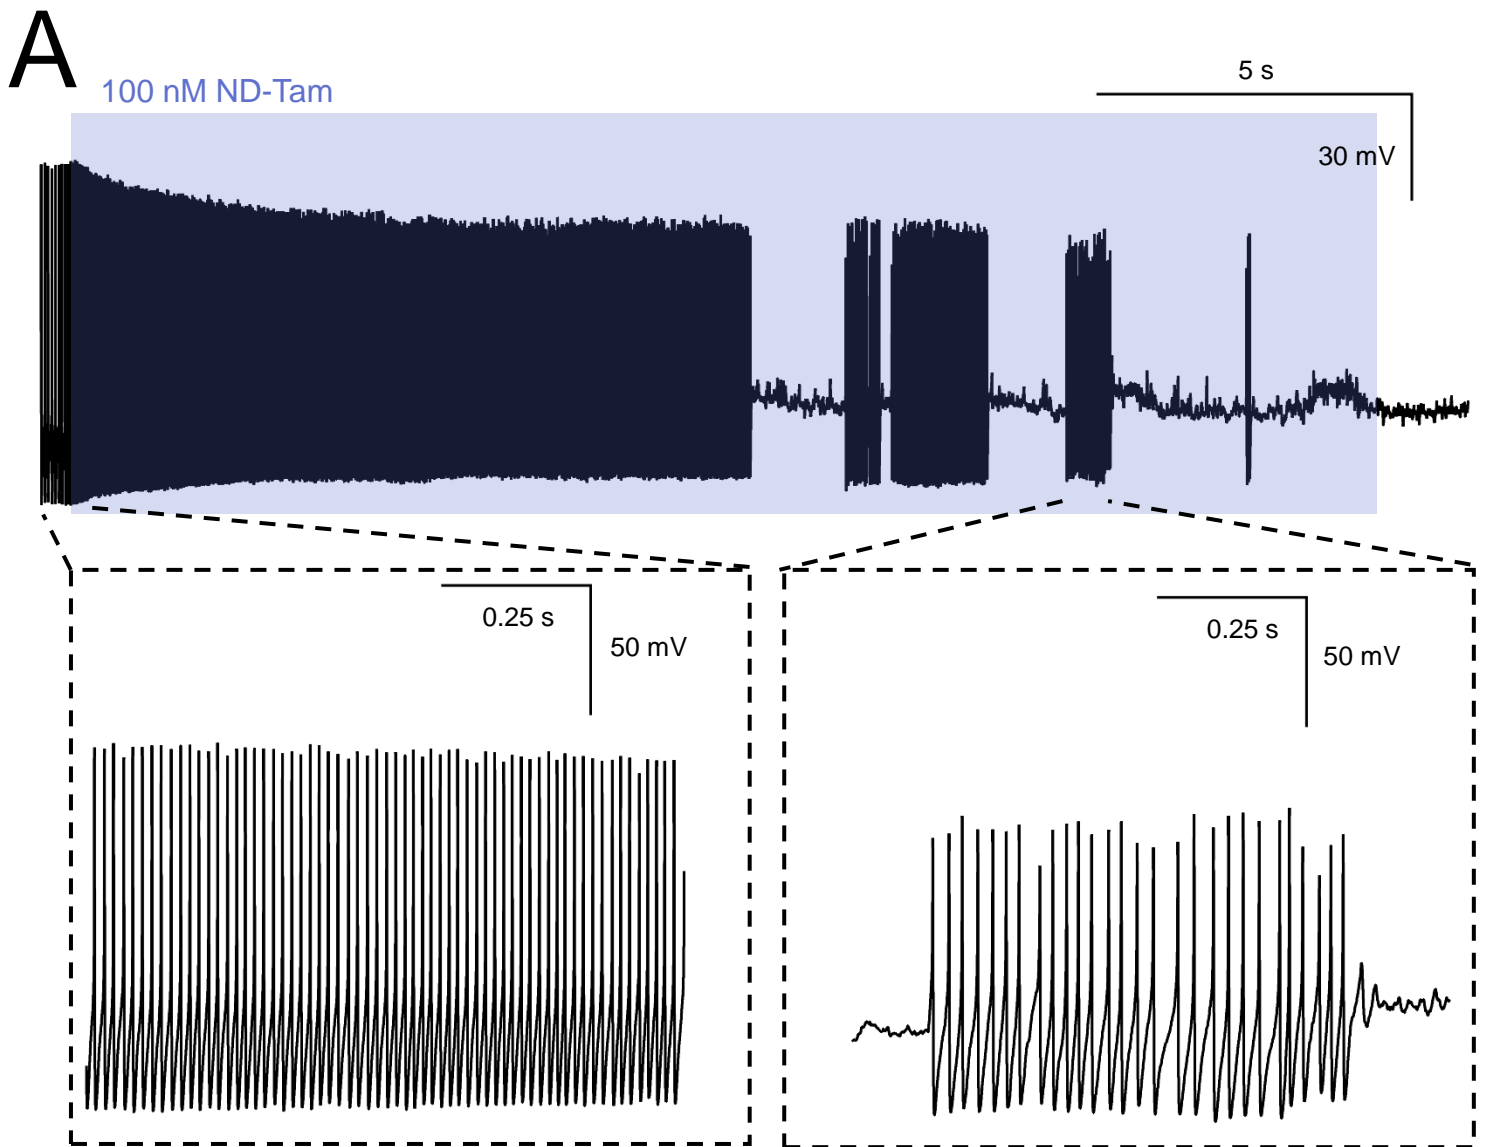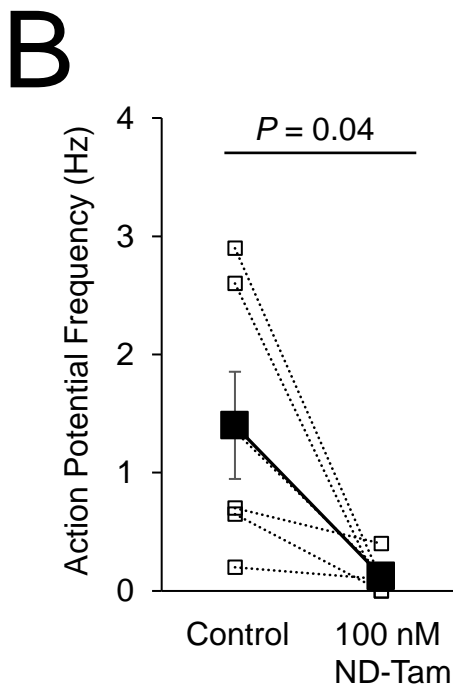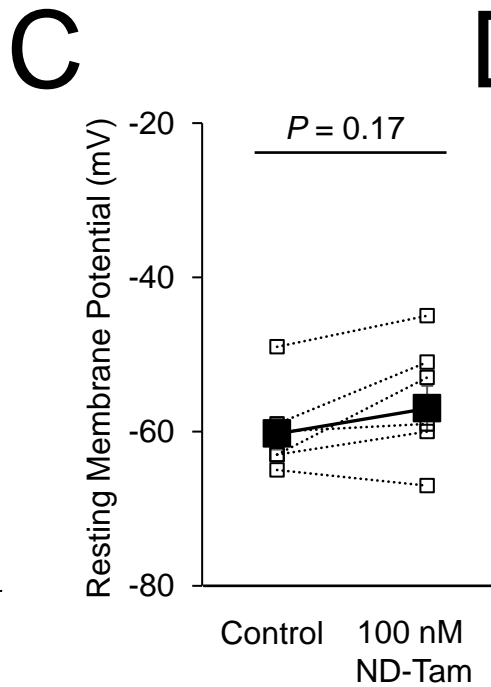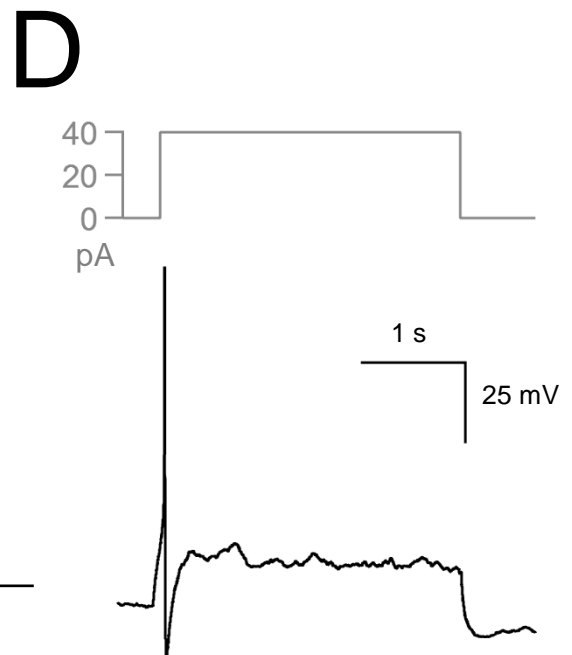

Supplemental Figure 5



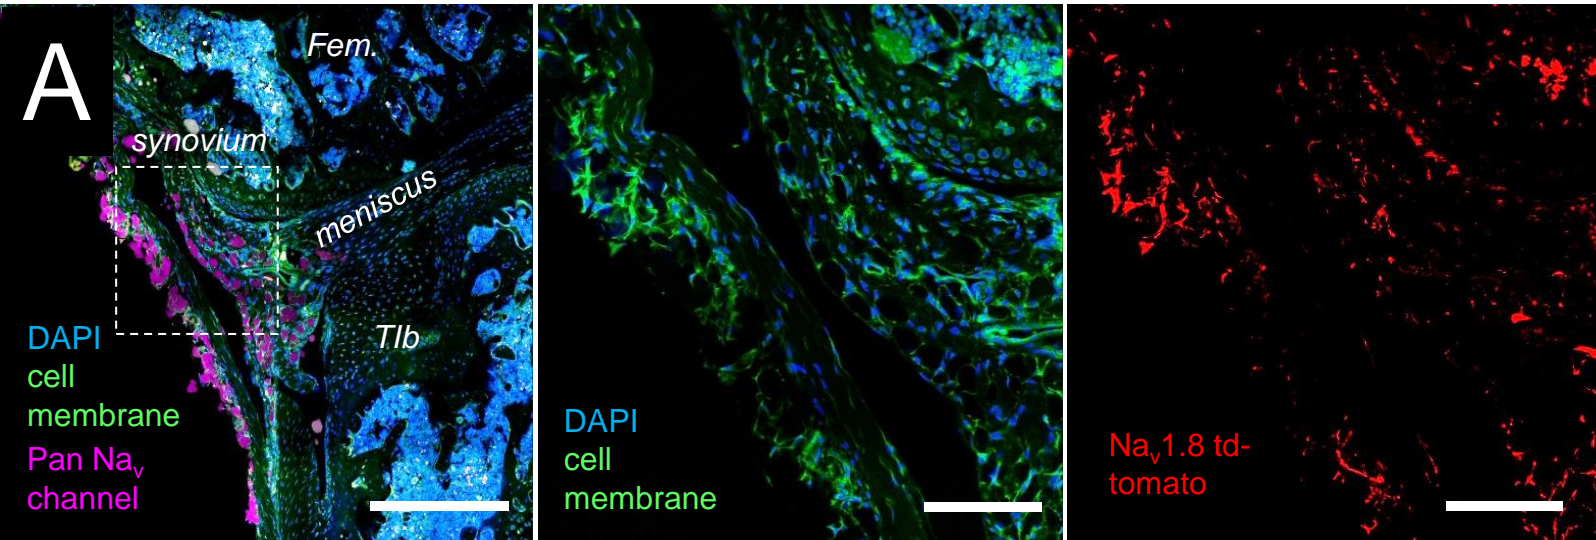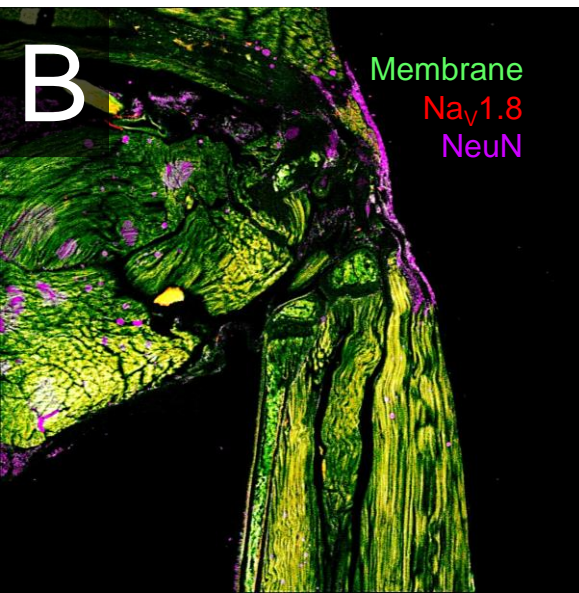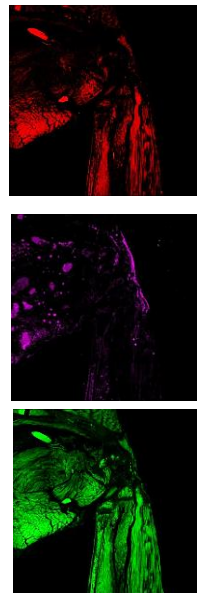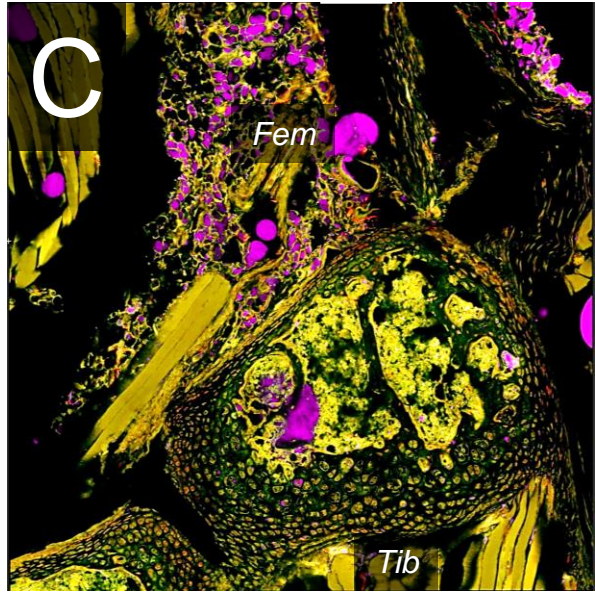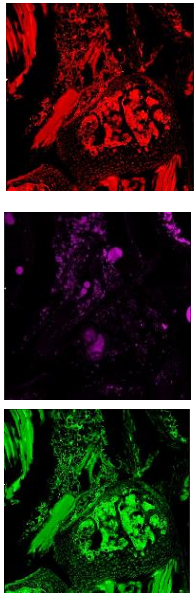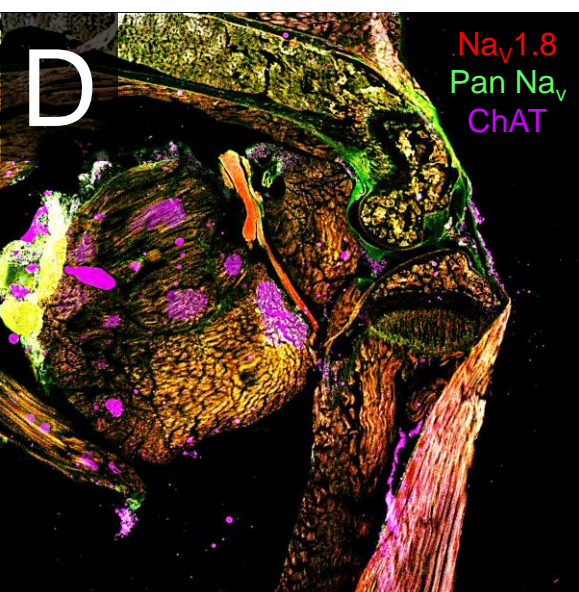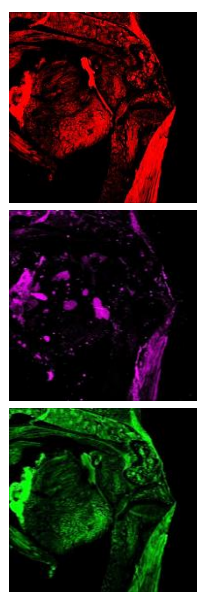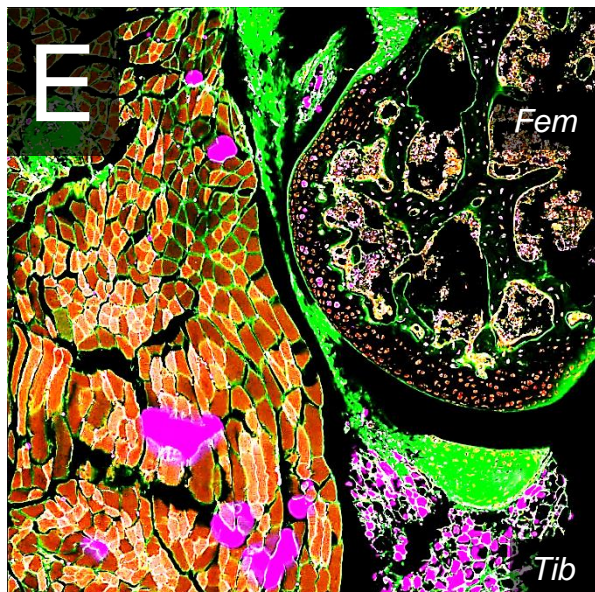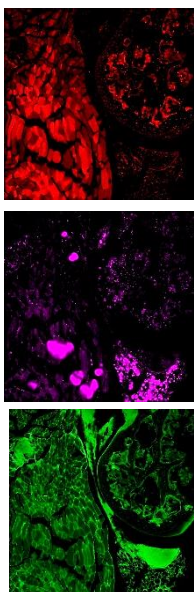

Supplemental Figure 6



| $I_{Na}$<br>Source                   | ND-Tam<br>$IC_{50}$ ; Slope        | 4OH-Tam<br>$IC_{50}$ ; Slope      | CBD<br>$IC_{50}$ ; Slope          | CBZ<br>$IC_{50}$ ; Slope          | Lidocaine<br>$IC_{50}$ ; Slope    |
|--------------------------------------|------------------------------------|-----------------------------------|-----------------------------------|-----------------------------------|-----------------------------------|
| DRG<br>-40 mV                        | 3.9 nM $\pm$ 0.7;<br>1.1 (5)       | Not tested                        | Not tested                        | Not tested                        | Not tested                        |
| DRG<br>-60 mV                        | 112 nM $\pm$ 15;<br>1.4 (6)        | Not tested                        | 1.1 $\mu$ M $\pm$ 0.2;<br>1.6 (7) | 70 $\mu$ M $\pm$ 8<br>0.9 (4-5)   | 23 $\mu$ M $\pm$ 2<br>1.2 (4-5)   |
| DRG<br>-100 mV                       | 1.7 $\mu$ M $\pm$ 0.2;<br>1.6 (13) | 3.3 $\mu$ M $\pm$ 0.6;<br>1.5 (8) | 3.3 $\mu$ M $\pm$ 0.8<br>1.4 (8)  | 254 $\mu$ M $\pm$ 20<br>1.1 (4-5) | 190 $\mu$ M $\pm$ 18<br>1.1 (4-6) |
| hNa <sub>v</sub> 1.1                 | 2.2 $\mu$ M $\pm$ 0.2;<br>1.9 (8)  | 3.1 $\mu$ M $\pm$ 0.5;<br>1.7 (6) | Not tested                        | Not tested                        | Not tested                        |
| hNa <sub>v</sub> 1.6                 | 2.4 $\mu$ M $\pm$ 0.5;<br>1.9 (6)  | 2.2 $\mu$ M $\pm$ 0.2;<br>1.8 (6) | Not tested                        | Not tested                        | Not tested                        |
| hNa <sub>v</sub> 1.7                 | 1.7 $\mu$ M $\pm$ 0.3;<br>2.2 (11) | 1.9 $\mu$ M $\pm$ 0.4;<br>1.8 (6) | Not tested                        | Not tested                        | Not tested                        |
| hNa <sub>v</sub> 1.7<br>S969A        | 12 $\mu$ M $\pm$ 0.3;<br>1.3 (5)   | Not tested                        | Not tested                        | Not tested                        | Not tested                        |
| hNa <sub>v</sub> 1.7<br>E1468A       | 1.8 $\mu$ M $\pm$ 0.2;<br>2.3 (6)  | Not tested                        | Not tested                        | Not tested                        | Not tested                        |
| hNa <sub>v</sub> 1.7<br>D1761A       | 5.1 $\mu$ M $\pm$ 0.9;<br>1.4 (8)  | Not tested                        | Not tested                        | Not tested                        | Not tested                        |
| hNa <sub>v</sub> 1.7<br>S969A:D1761A | 36 $\mu$ M $\pm$ 1.1;<br>0.9 (6)   | Not tested                        | Not tested                        | Not tested                        | Not tested                        |
| hNav1.7<br>F1748A                    | 1.1 $\mu$ M $\pm$ 0.9;<br>2.1 (6)  | Not tested                        | Not tested                        | Not tested                        | Not tested                        |
| hNav1.7<br>Y1755A                    | 1.9 $\mu$ M $\pm$ 0.8;<br>2.2 (6)  | Not tested                        | Not tested                        | Not tested                        | Not tested                        |
| hNa <sub>v</sub> 1.8                 | 2.3 $\mu$ M $\pm$ 0.2<br>2.1 (4-5) | 3.4 $\mu$ M $\pm$ 0.1<br>(4-5)    | Not tested                        | Not tested                        | Not tested                        |

# Supplemental Table 1

| Chemical | DRG $I_{Na}$ , HP = -100 mV<br>$IC_{50}$          | human $Na_v1.7$<br>$K_i$                    |
|----------|---------------------------------------------------|---------------------------------------------|
| ND-Tam   | $1.7 \mu\text{M} \pm 0.2$<br>(13)                 | $0.96 \mu\text{M} \pm 0.1$<br>(4)           |
| 4OH-Tam  | $3.3 \mu\text{M} \pm 0.6$<br>(8)                  | $1.2 \mu\text{M} \pm 0.1$<br>(4)            |
| TPE      | No inhibition<br>$EC_{50} > 10 \mu\text{M}$ , (4) | No binding,<br>$K_i > 10 \mu\text{M}$ , (4) |
| NM2P     | No inhibition<br>$EC_{50} > 10 \mu\text{M}$ , (4) | $2.9 \mu\text{M} \pm 0.1$<br>(4)            |
| NDBP     | No inhibition<br>$EC_{50} > 10 \mu\text{M}$ , (4) | $1.8 \mu\text{M} \pm 0.1$<br>(4)            |
| 4HBP     | No inhibition<br>$EC_{50} > 10 \mu\text{M}$ , (4) | $1.5 \mu\text{M} \pm 0.1$<br>(4)            |

## Supplemental Table 2



| Source           | ND-Tam<br>IC <sub>50</sub> | CBD<br>IC <sub>50</sub> | CBZ<br>IC <sub>50</sub> | Lid.<br>IC <sub>50</sub> |
|------------------|----------------------------|-------------------------|-------------------------|--------------------------|
| DRG<br>Peak Amp. | 0.7 μM ± 0.3<br>(7)        | 3.2 μM ± 0.8<br>(6)     | 419 μM ± 216<br>(6)     | 16 μM ± 1.3<br>(6)       |
| DRG<br>Frequency | 119 nM ± 22<br>(7)         | 1.8 μM ± 0.3<br>(6)     | 432 μM ± 209<br>(6)     | 7 μM ± 1.2<br>(6)        |

## Supplemental Table 3

**A** two-way repeated measures ANOVA with Sidak's post test

| Comparison     | Pre-injection | 30 min      | 1h         | 2h         | 24         |
|----------------|---------------|-------------|------------|------------|------------|
| Vehicle-ND-Tam | $P = 0.93$    | $P = 0.008$ | $P = 0.12$ | $P = 0.97$ | $P = 0.94$ |

**B** two-way repeated measures ANOVA with Tukey's post test

| Comparison        | Pre-injection | 30 min       | 1h         | 2h         | 3h         | 24h        |
|-------------------|---------------|--------------|------------|------------|------------|------------|
| Vehicle-ND-Tam    | $P = 0.98$    | $P = 0.003$  | $P = 0.09$ | $P = 0.29$ | $P = 0.03$ | $P = 0.71$ |
| Vehicle-CBD       | $P = 0.84$    | $P < 0.0001$ | $P = 0.77$ | $P = 0.98$ | $P = 0.02$ | $P = 0.57$ |
| Vehicle-Lidocaine | $P = 0.99$    | $P < 0.0001$ | $P = 0.23$ | $P = 0.08$ | $P = 0.03$ | $P = 0.40$ |
| ND-Tam-CBD        | $P = 0.92$    | $P = 0.03$   | $P = 0.39$ | $P = 0.06$ | $P = 0.34$ | $P = 0.99$ |
| ND-Tam-Lidocaine  | $P = 0.98$    | $P = 0.003$  | $P = 0.87$ | $P = 0.67$ | $P = 0.90$ | $P = 0.83$ |

**C** one-way ANOVA with Tukey's post test

| Comparison        | AUC          |
|-------------------|--------------|
| Vehicle-ND-Tam    | $P < 0.0001$ |
| Vehicle-CBD       | $P = 0.001$  |
| Vehicle-Lidocaine | $P < 0.0001$ |
| ND-Tam-CBD        | $P = 0.17$   |
| ND-Tam-Lidocaine  | $P = 0.13$   |
| CBD-Lidocaine     | $P = 0.002$  |

**D**

two-way repeated measures ANOVA with Tukey's post test

| Comparison        | Pre-DMM    | Pre-injection | 0h         | 30 min      | 1h           | 2h           | 3.5h       | 24h        |
|-------------------|------------|---------------|------------|-------------|--------------|--------------|------------|------------|
| Vehicle-ND-Tam    | $P = 0.34$ | $P = 0.48$    | $P = 0.97$ | $P = 0.03$  | $P = 0.0004$ | $P = 0.0009$ | $P = 0.12$ | $P = 0.90$ |
| Vehicle-Lidocaine | $P = 0.62$ | $P = 0.61$    | $P = 0.86$ | $P = 0.004$ | $P = 0.005$  | $P = 0.91$   | $P = 0.89$ | $P = 0.99$ |
| ND-Tam-Lidocaine  | $P = 0.91$ | $P = 0.74$    | $P = 0.61$ | $P = 0.001$ | $P = 0.0007$ | $P < 0.0001$ | $P = 0.47$ | $P = 0.97$ |

**E**

one-way ANOVA with Tukey's post test

| Comparison        | AUC          |
|-------------------|--------------|
| Vehicle-ND-Tam    | $P < 0.0001$ |
| Vehicle-Lidocaine | $P = 0.001$  |
| ND-Tam-Lidocaine  | $P = 0.0001$ |

Supplemental Table 4 cont.
